# Supplementary material for: The MDM2–p53 Axis Represents a Therapeutic Vulnerability Unique to Glioma Stem Cells
Source: MDPI journal article supplement (doi:10.3390/ijms25073948), 2024-04-02

Original Western Blot images

Figure 1

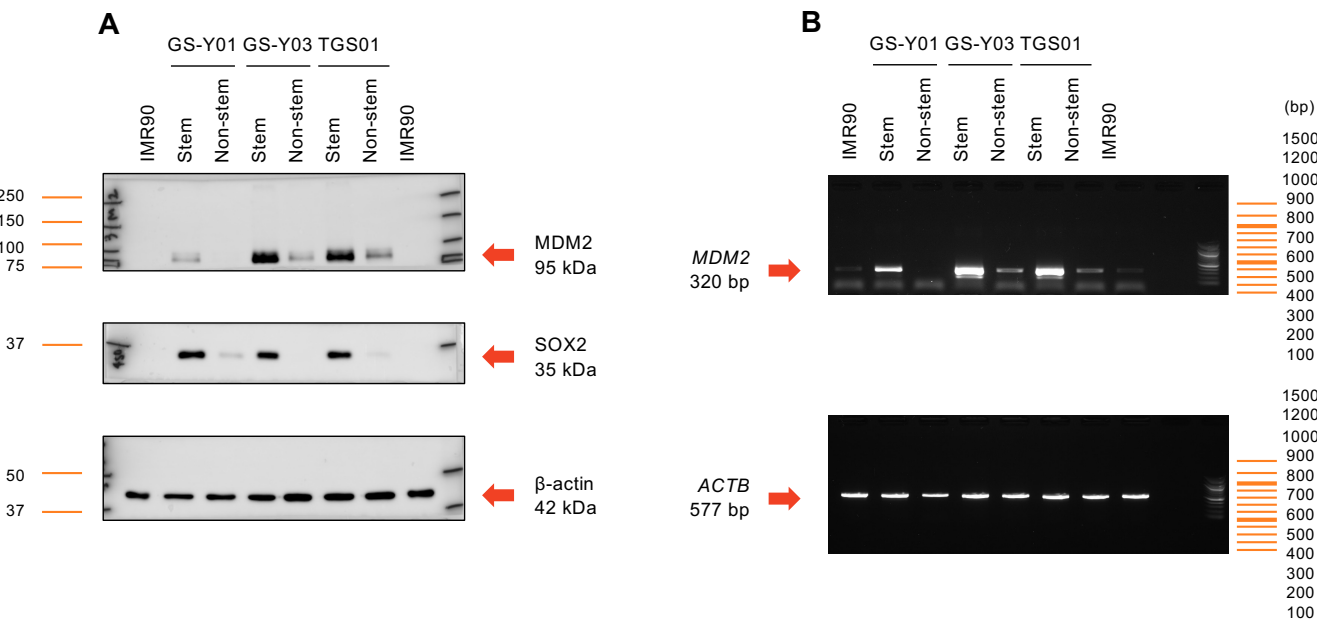

Figure 2

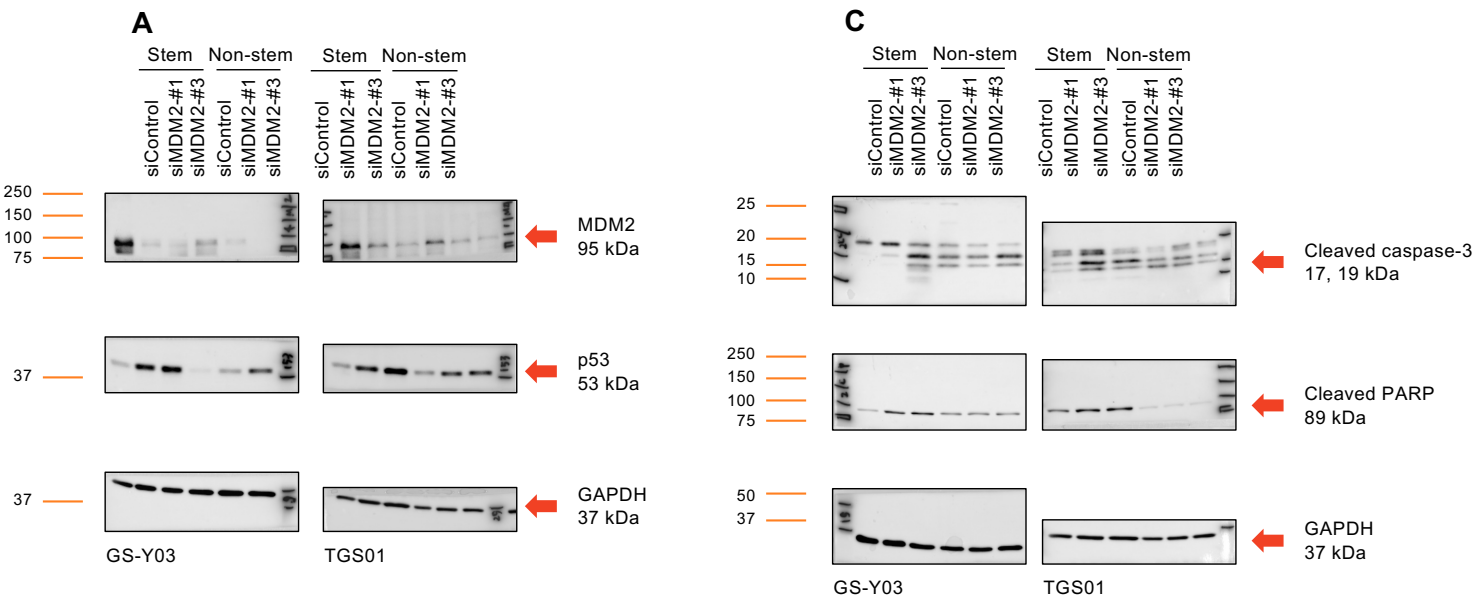

Figure 3

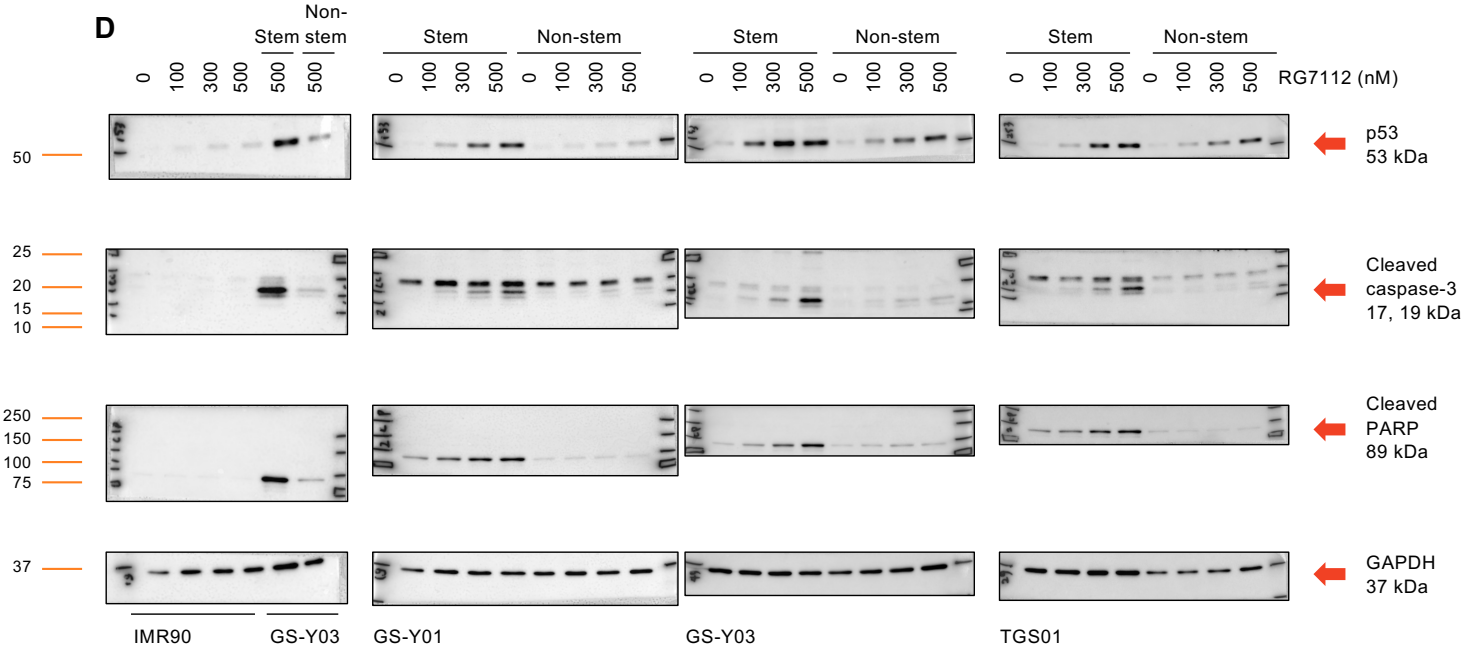

Figure 4

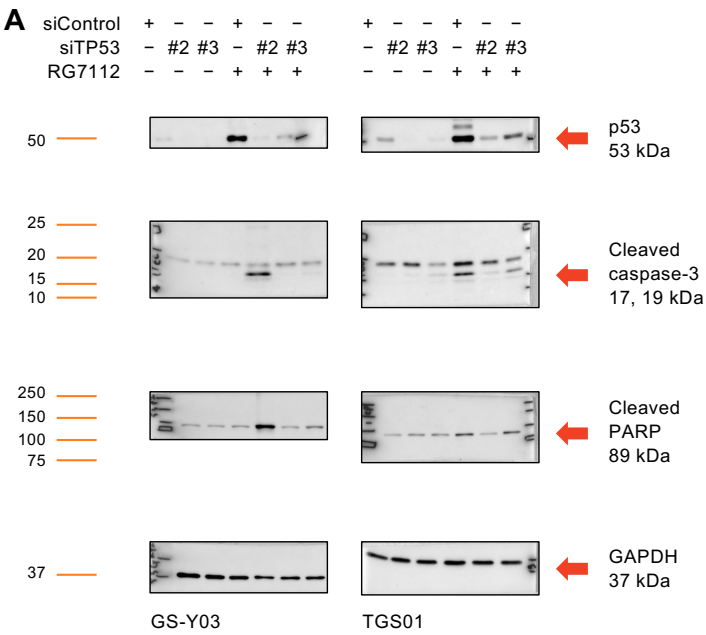

Figure 5

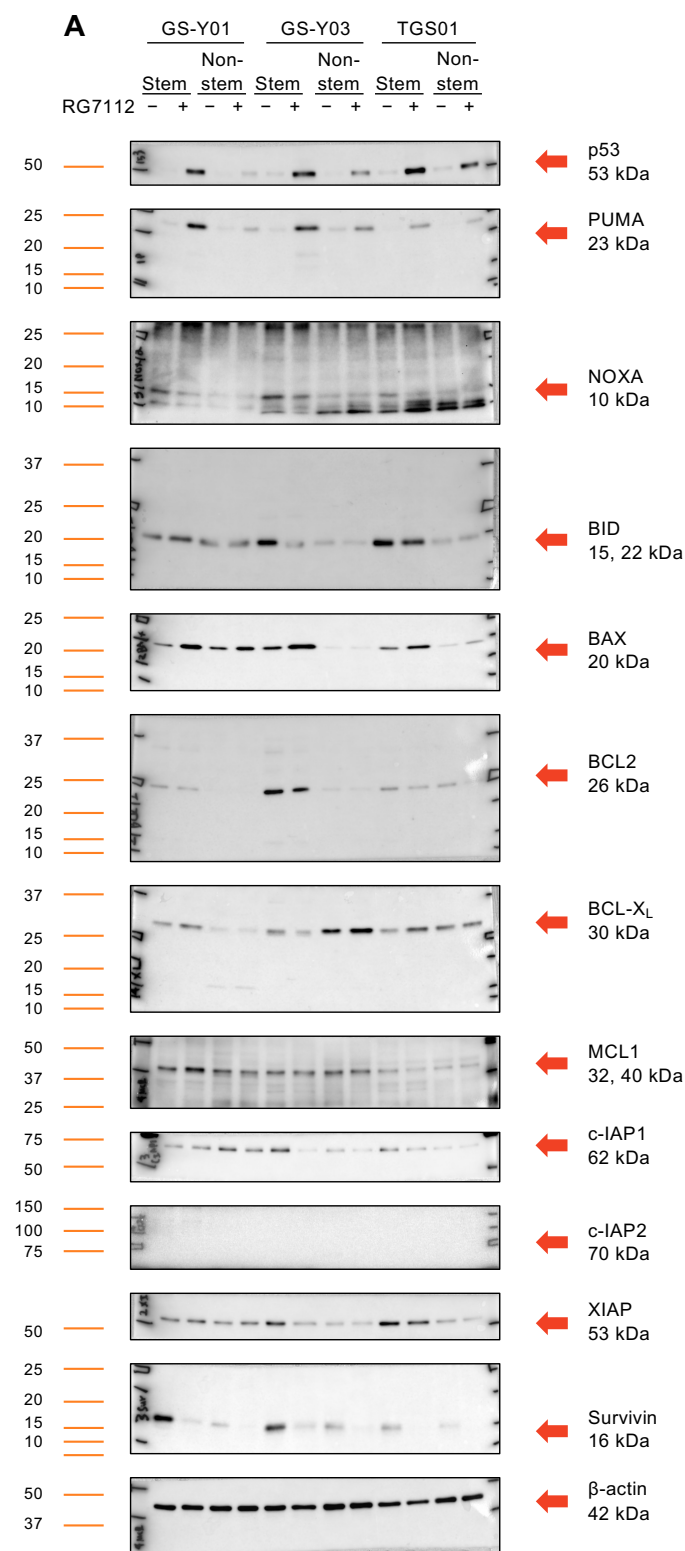

Figure 5

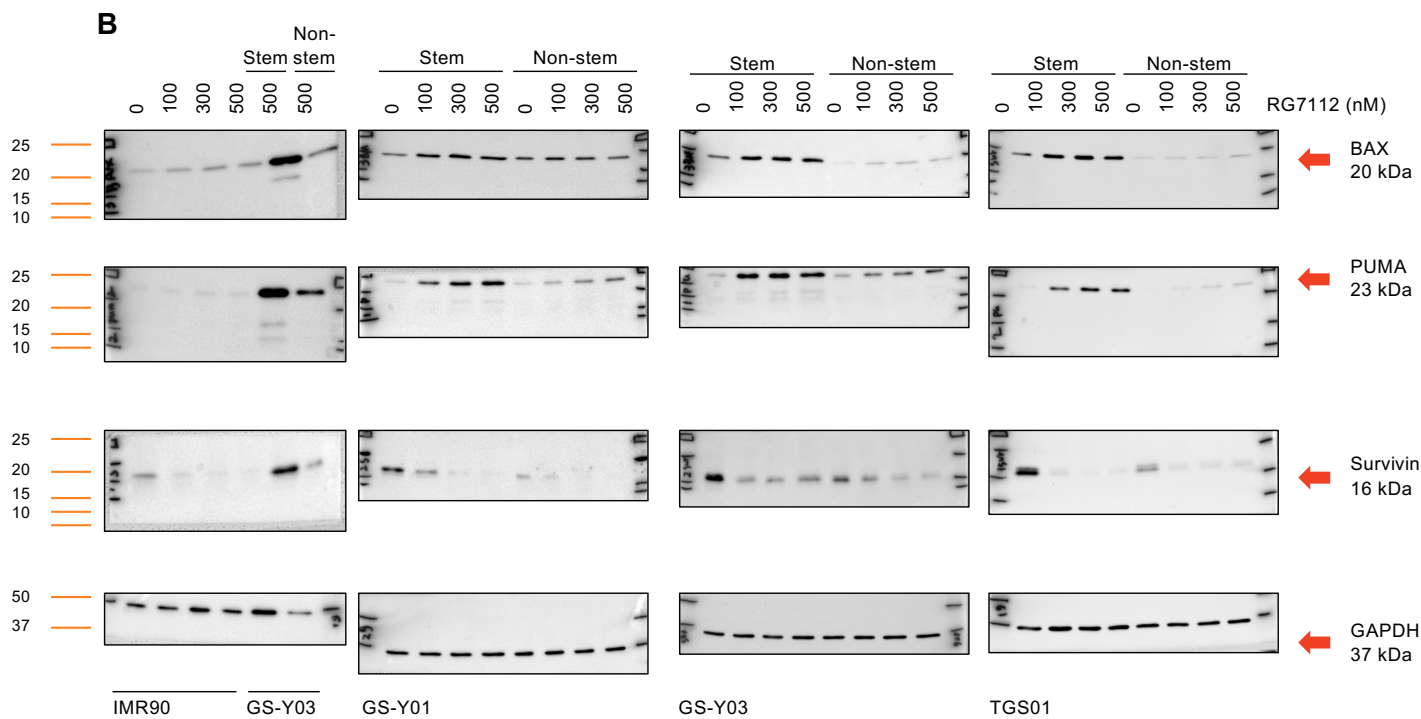

Figure 6

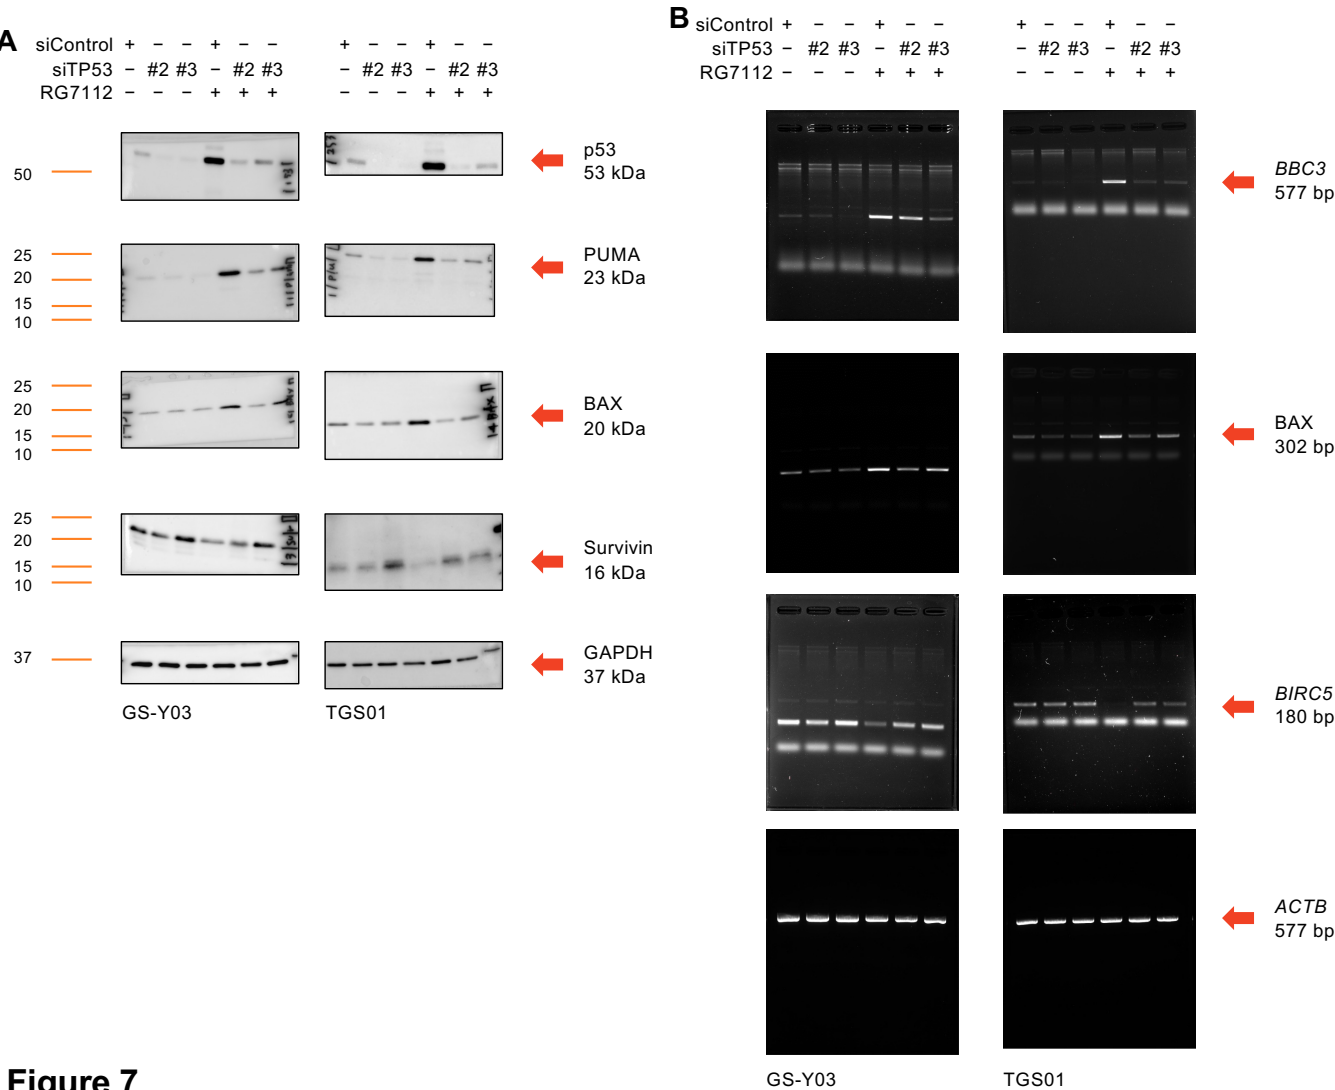

Figure 7

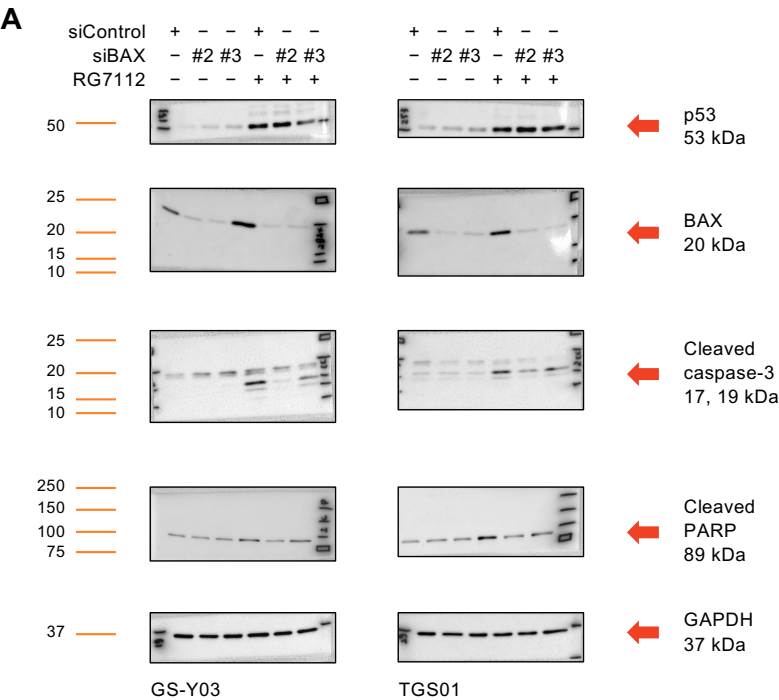

Figure 8

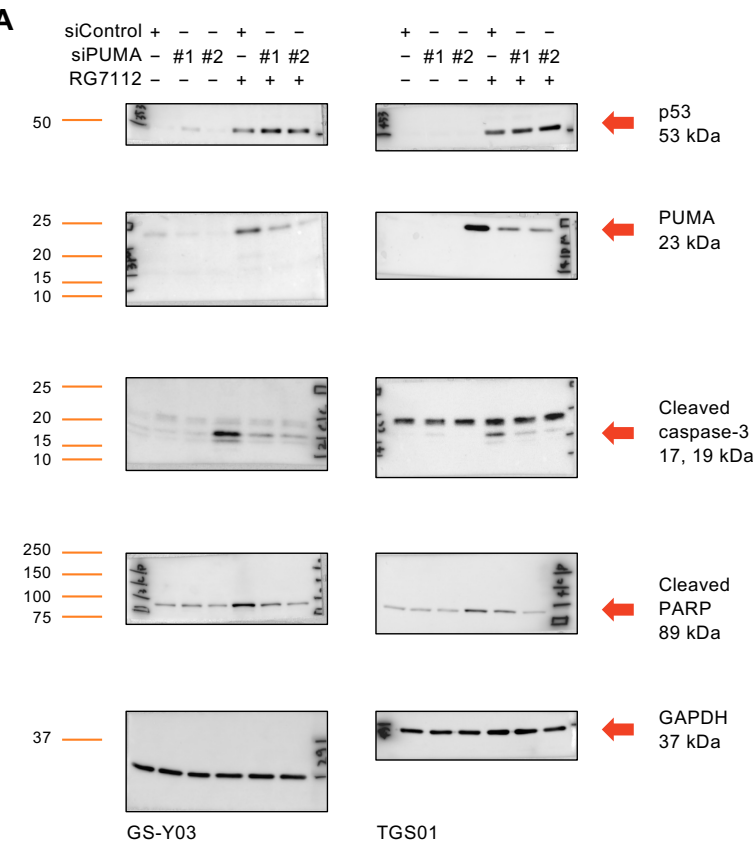

Figure 9

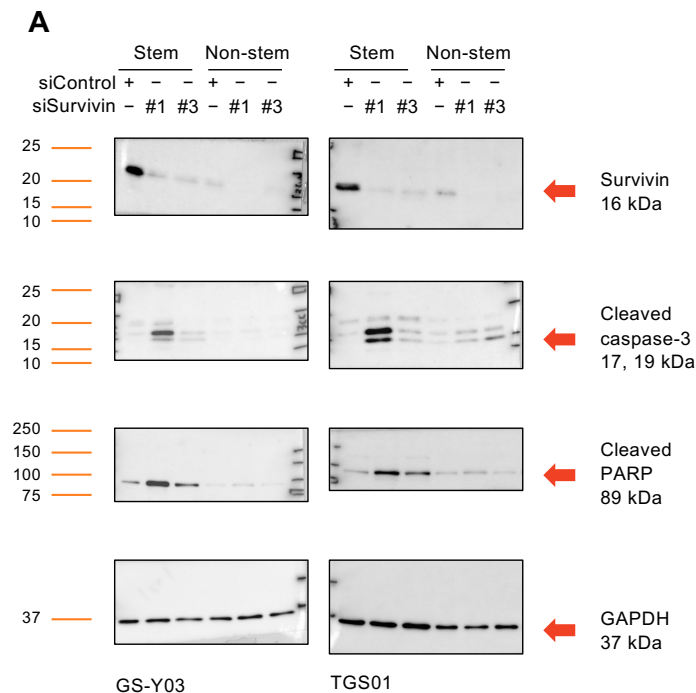

Figure 10

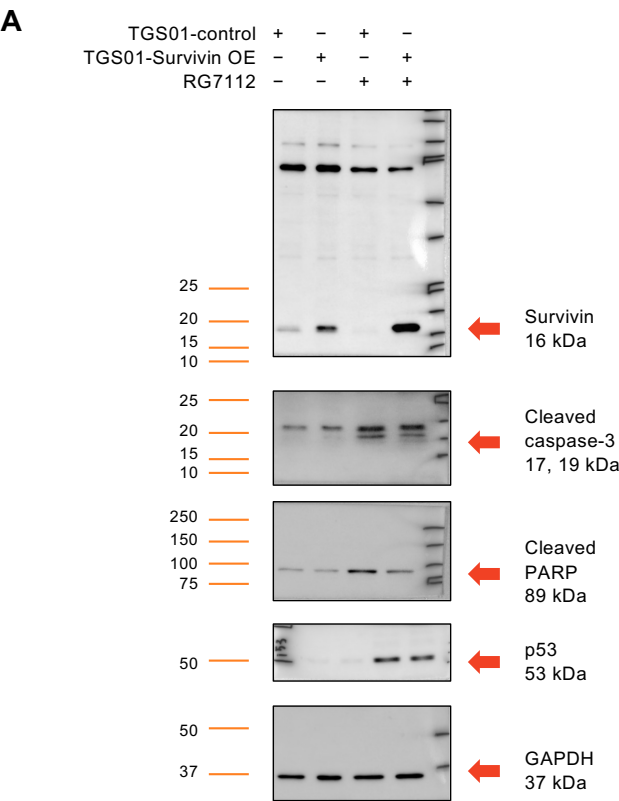

Supplement: s1 [file s1]
